# Supplementary material for: A comprehensive review on carrot ( Daucus carota L.): the effect of different drying methods on nutritional properties and its processing as value-added foods
Source: Royal Society of Chemistry journal article supplement (doi:10.1039/d3fb00162h), 2024-01-01
Supplement: d3fb00162h1.pdf [file d3fb00162h1.pdf]

**Table 1** Nutritional composition of fresh carrot per 100 g<sup>14-18</sup>.

| <b>Proximate composition</b>         | <b>Amount</b> | <b>Carbohydrates</b>                   | <b>Amount</b> |
|--------------------------------------|---------------|----------------------------------------|---------------|
| Water (g)                            | 86 – 89       | Carbohydrate, by difference (g)        | 7.45 – 9.58   |
| Energy (kcal)                        | 35.29 – 41    | Fiber, total dietary (g)               | 2.8           |
| Protein (g)                          | 0.93 – 1.26   | Total Sugars (g)                       | 4.74          |
| Total lipid (g)                      | 0.24 – 0.27   | Sucrose (g)                            | 3.59          |
| Ash (g)                              | 0.84 – 0.97   | Glucose (g)                            | 0.59          |
| Fat (g)                              | 0.05 – 0.2    | Fructose (g)                           | 0.55          |
| Fiber (g)                            | 1.2 – 2.4     | Starch (g)                             | 1.43          |
| Total solids (%)                     | 10.6 – 11.3   | <b>Amino acids</b>                     |               |
| Total soluble solids (%)             | 9.0 – 10.4    | Tryptophan (g)                         | 0.012         |
| Acidity (%)                          | 0.04 – 0.06   | Threonine (g)                          | 0.191         |
| pH                                   | 6.5 – 6.6     | Isoleucine (g)                         | 0.077         |
| <b>Vitamins and other components</b> |               | Leucine (g)                            | 0.102         |
| Ascorbic acid (mg)                   | 2.3 – 15.33   | Lysine (g)                             | 0.101         |
| Thiamin (mg)                         | 0.066         | Methionine (g)                         | 0.02          |
| Riboflavin (mg)                      | 0.058         | Cystine (g)                            | 0.083         |
| Niacin (mg)                          | 0.983         | Phenylalanine (g)                      | 0.061         |
| Pantothenic acid (mg)                | 0.273         | Tyrosine (g)                           | 0.043         |
| Vitamin B <sub>6</sub> (mg)          | 0.138         | Valine (g)                             | 0.069         |
| Folate (μg)                          | 19            | <b>Lipids</b>                          |               |
| Choline (mg)                         | 8.8           | Fatty acids, total saturated (g)       | 0.032         |
| Betaine (mg)                         | 0.4           | Fatty acids, total monounsaturated (g) | 0.012         |
| Vitamin A (μg)                       | 835           | Fatty acids, total polyunsaturated (g) | 0.102         |
| Beta-carotene (μg)                   | 5650–8285     | <b>Minerals</b>                        |               |
| Alpha-carotene (μg)                  | 2425–3767     | Magnesium (mg)                         | 9 – 12        |
| Vitamin K (μg)                       | 13.2          | Phosphorus (mg)                        | 25 – 280      |
| Lycopene (μg)                        | 1000          | Potassium (mg)                         | 240 – 320     |
| Lutein (μg)                          | 149 – 313     | Sodium (mg)                            | 40 – 69       |
| Anthocyanins (mg)                    | 1.5 – 126     | Calcium (mg)                           | 2 – 80        |
